# Supplementary material for: Comparison of Human Eukaryotic Translation Initiation Factors 5A1 and 5AL1: Identification of Amino Acid Residues Important for EIF5A1 Lysine 50 Hypusination and Its Protein Stability
Source: MDPI journal article supplement (doi:10.3390/ijms24076067), 2023-03-23

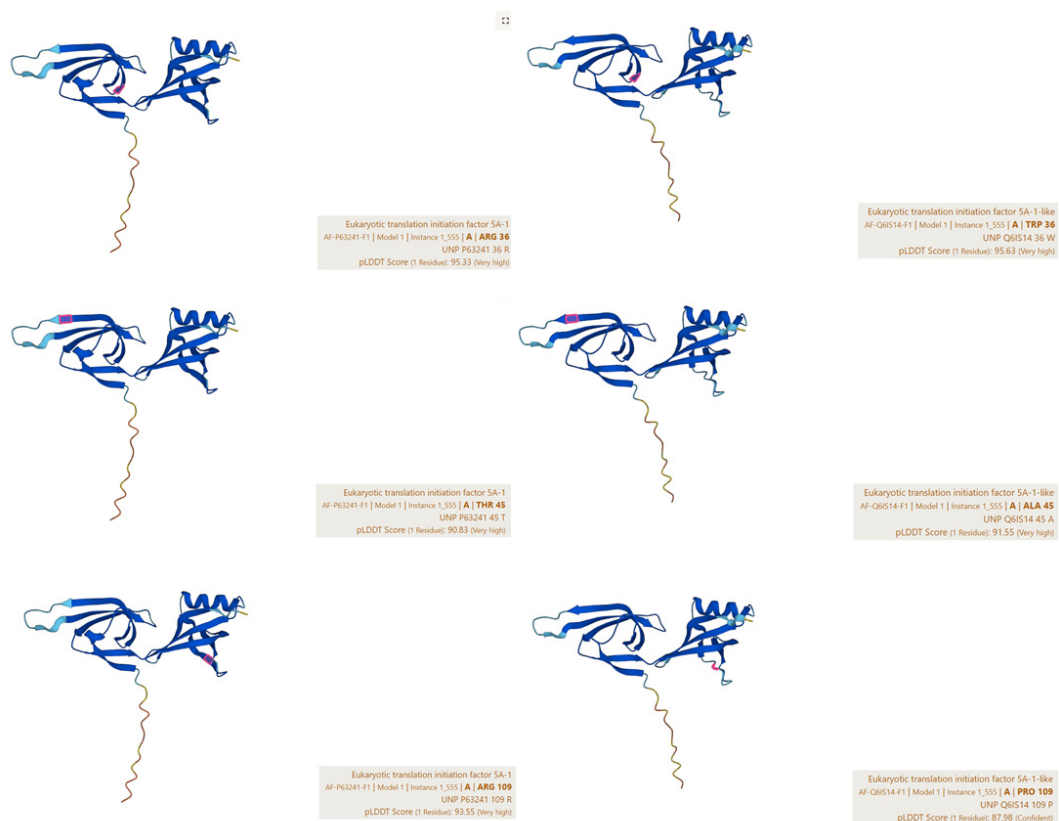

**Figure S1.** Through the AlphaFold Protein Structure Database (<https://alphafold.ebi.ac.uk/>, accessed on 9 January 2023), we obtained the AlphaFold protein structures of EIF5A1 (UniProt: P63241) and EIF5AL1 (UniProt: Q6IS14). The red part on each structure represents the position of the amino acid at residue 36, 45, or 109.

EIF5A1

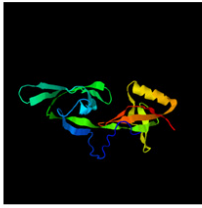

eTM-score = 0.84

EIF5A1-R36W

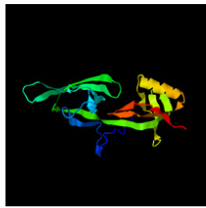

eTM-score = 0.84

EIF5A1-T45A

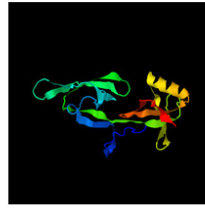

eTM-score = 0.85

EIF5A1-R109P

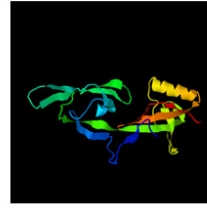

eTM-score = 0.84

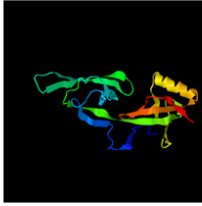

eTM-score = 0.78

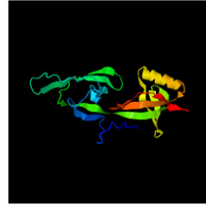

eTM-score = 0.76

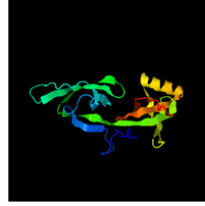

eTM-score = 0.70

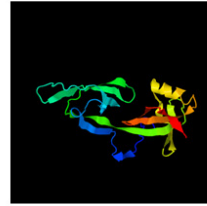

eTM-score = 0.77

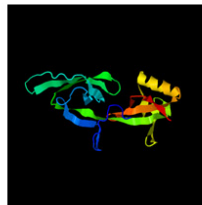

eTM-score = 0.78

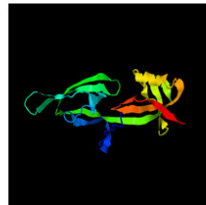

eTM-score = 0.76

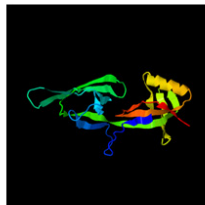

eTM-score = 0.70

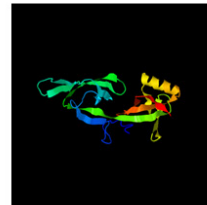

eTM-score = 0.70

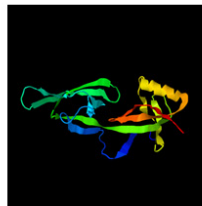

eTM-score = 0.78

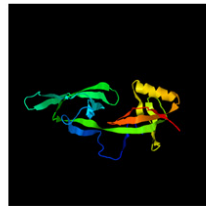

eTM-score = 0.76

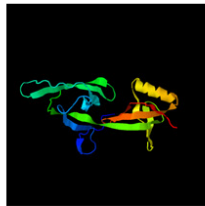

eTM-score = 0.65

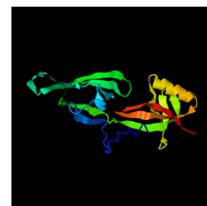

eTM-score = 0.70

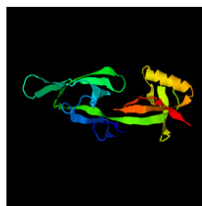

eTM-score = 0.69

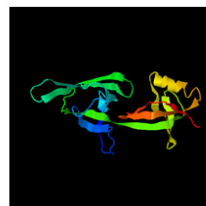

eTM-score = 0.63

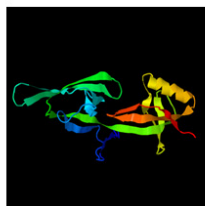

eTM-score = 0.63

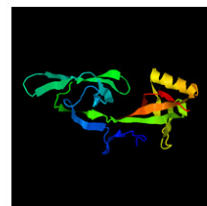

eTM-score = 0.70

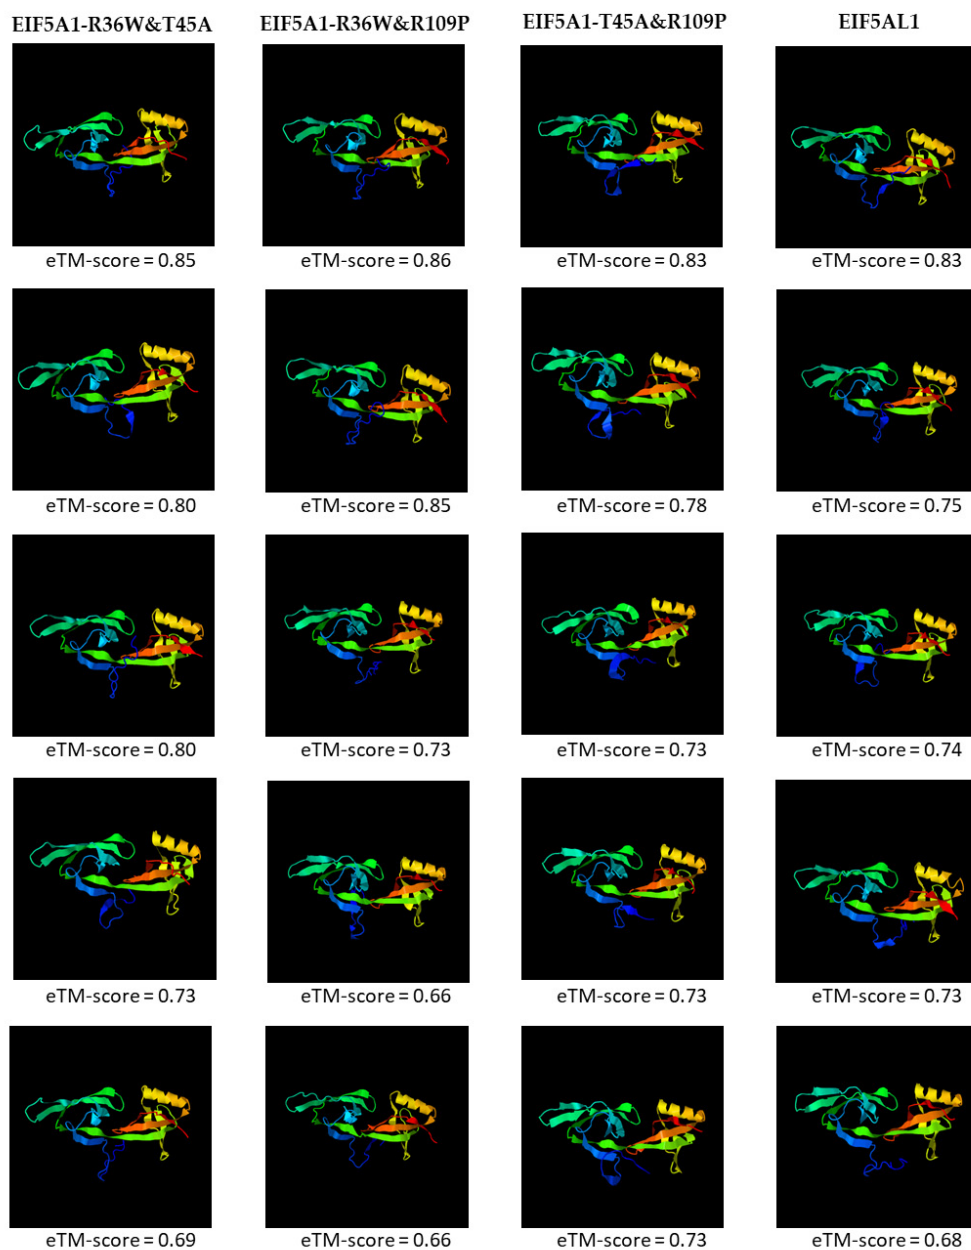

**Figure S2.** Top five models predicted by D-I-TASSER server (<https://zhanggroup.org/D-I-TASSER>, accessed on 9 January 2023) based on the amino acid sequences of the EIF5A1, EIF5AL1, and EIF5A1 mutant proteins (EIF5A1-R36W, EIF5A1-T45A, EIF5A1-R109P, EIF5A1-R36W&T45A, EIF5A1-R36W&R109P, and EIF5A1-T45A&R109P). The model confidence is represented by estimated TM-score (eTM-score), calculated based on the significance of threading template alignments, contact map satisfaction rate, mean absolute error between the distance of the model and the distance of AttentionPotential, and convergence of D-I-TASSER simulations. eTM-score is typically in the range of [0, 1], with higher eTM-score signifying higher model confidence.

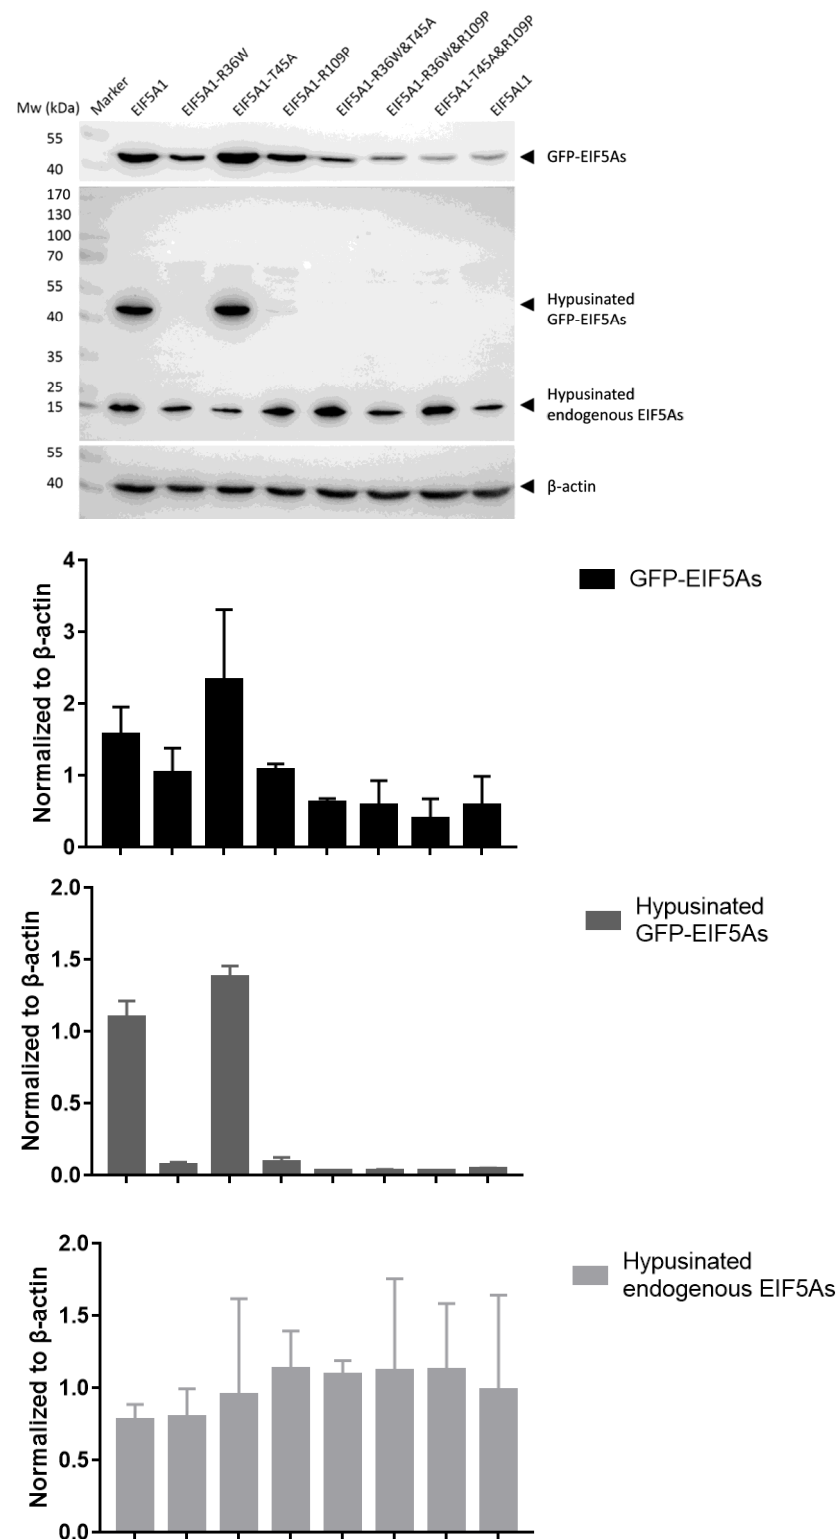

**Figure S3.** The hypusine modification levels of EIF5A1, EIF5AL1, and EIF5A1 mutant proteins. HeLa cells were transfected with EIF5A1, EIF5AL1, and EIF5A1 mutant plasmids, cells were harvested and lysed at 48 h after transfection. The proteins were extracted, and hypusine modification levels of EIF5A1, EIF5AL1, as well as EIF5A1 mutant proteins were determined by immunoblot analysis. Signals were quantified and normalized to β-actin.



B

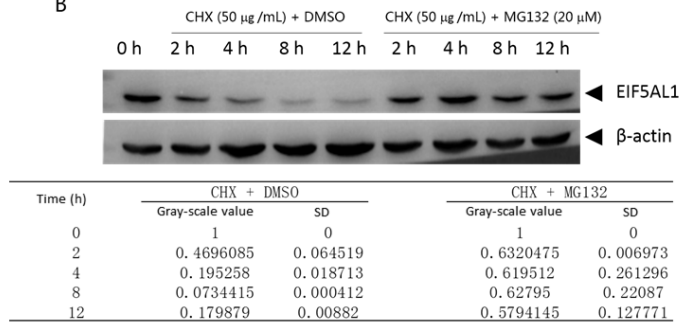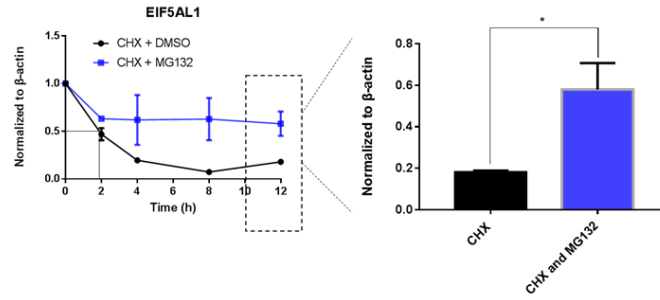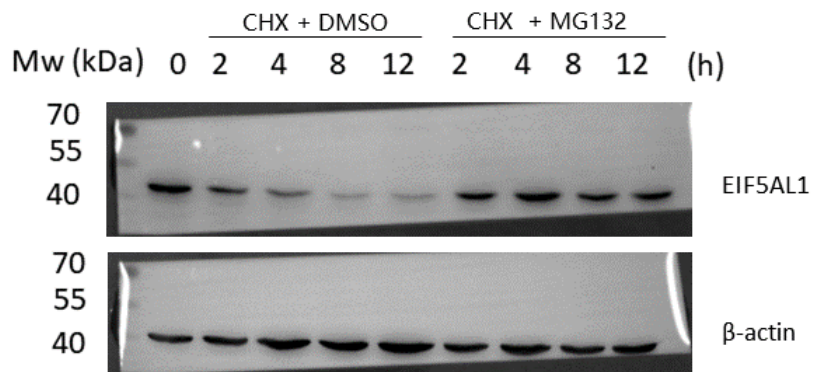

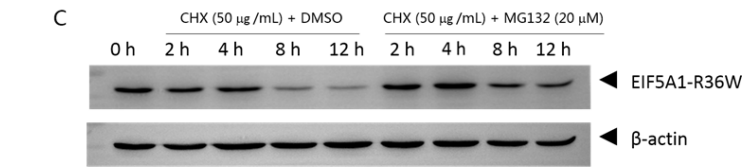

| Time (h) | CHX + DMSO       |          | CHX + MG132      |          |
|----------|------------------|----------|------------------|----------|
|          | Gray-scale value | SD       | Gray-scale value | SD       |
| 0        | 1                | 0        | 1                | 0        |
| 2        | 0.780932         | 0.430777 | 0.9971835        | 0.025902 |
| 4        | 0.955995         | 0.02337  | 1.214434         | 0.064514 |
| 8        | 0.292516         | 0.052993 | 0.787019         | 0.140741 |
| 12       | 0.146782         | 0.037989 | 0.84876          | 0.213886 |

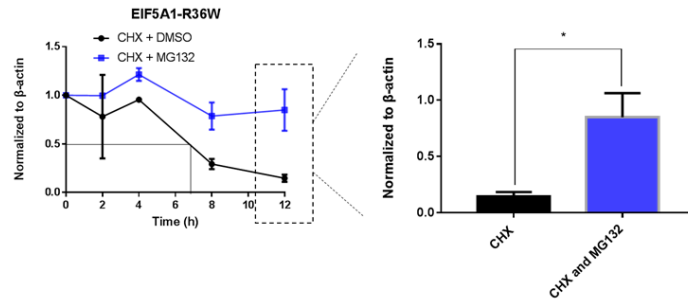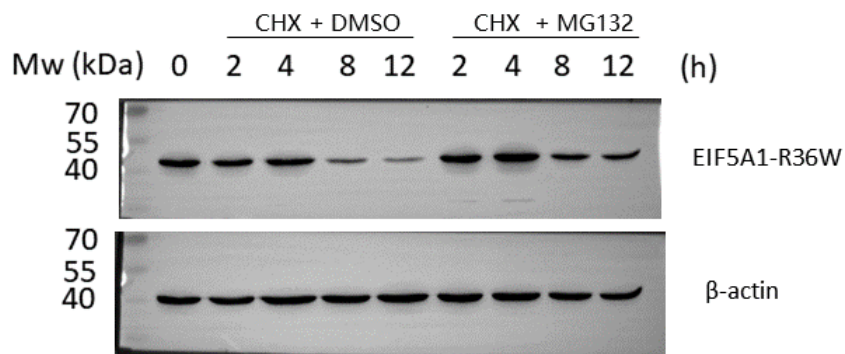

D

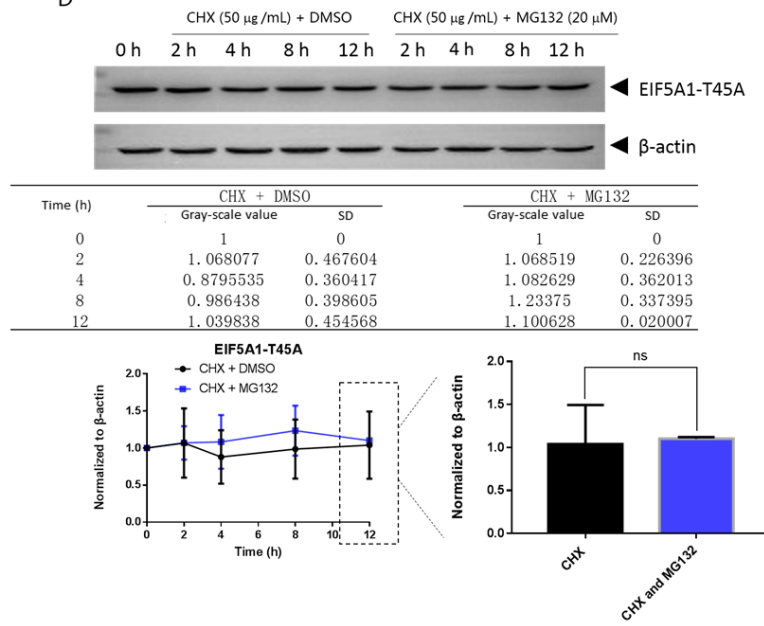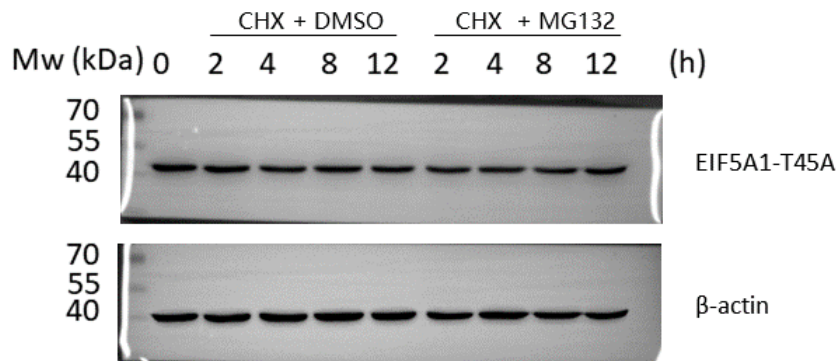

E

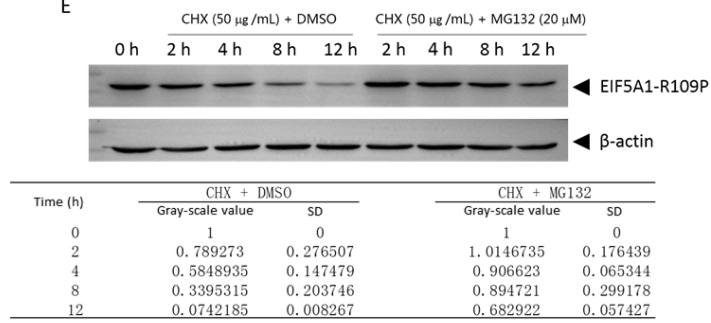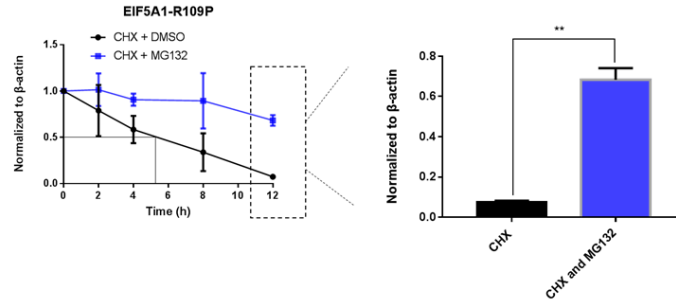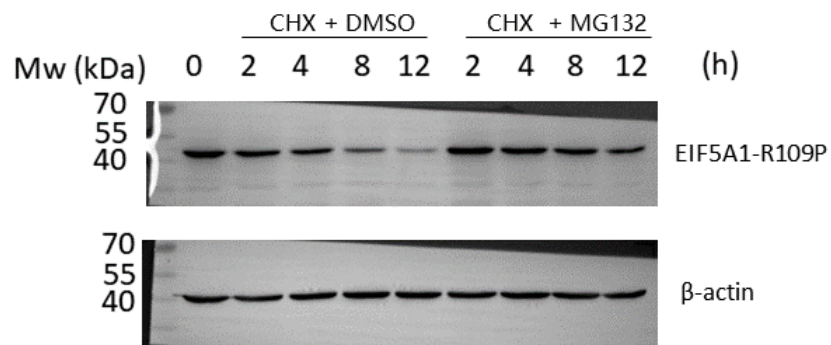

F

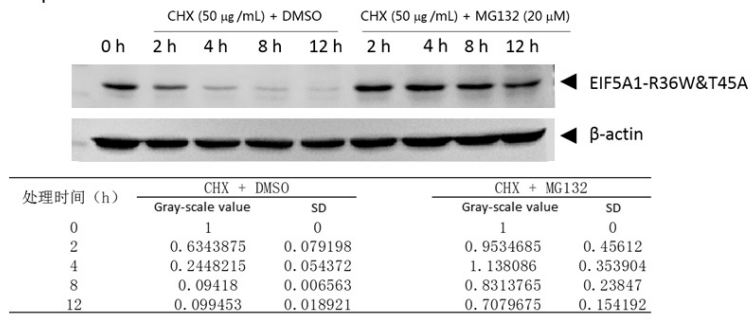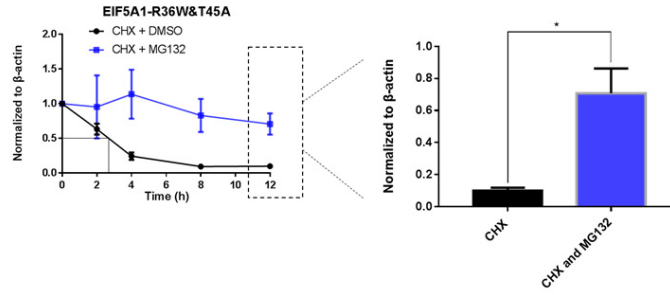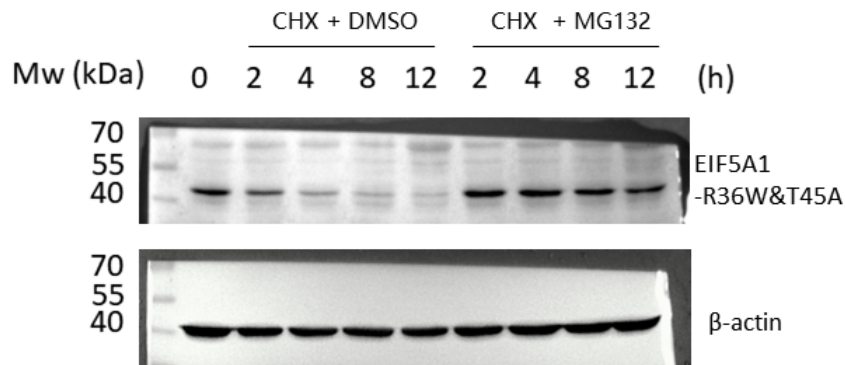

G

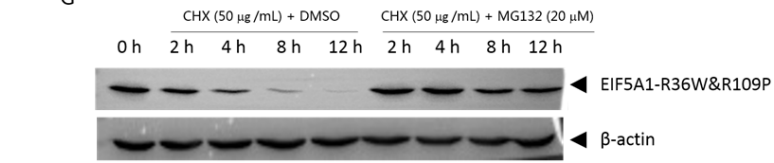

| Time (h) | CHX + DMSO       |          | CHX + MG132      |          |
|----------|------------------|----------|------------------|----------|
|          | Gray-scale value | SD       | Gray-scale value | SD       |
| 0        | 1                | 0        | 1                | 0        |
| 2        | 0.61891          | 0.031567 | 0.7648195        | 0.001604 |
| 4        | 0.2847425        | 0.004662 | 0.7706555        | 0.001418 |
| 8        | 0.0909365        | 0.011412 | 0.5205295        | 0.071045 |
| 12       | 0.025922         | 0.020911 | 0.4524465        | 0.067251 |

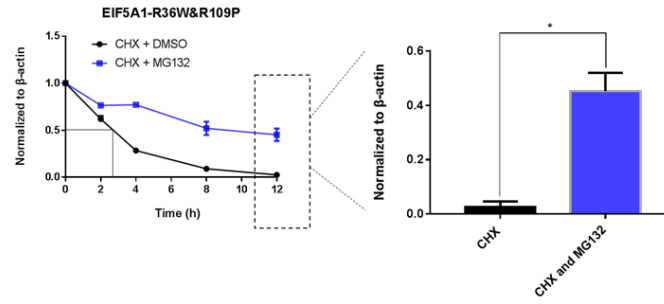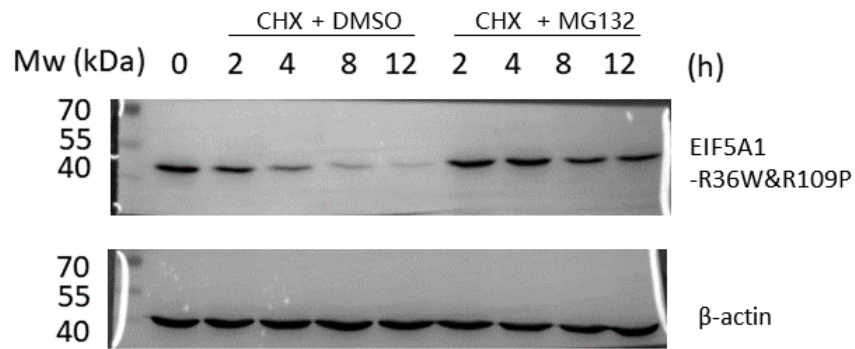



**Table S1.** Primers for constructing EIF5A1, EIF5AL1, and the EIF5A1 mutants.

| Gene Name               | Primer Name             | Primer Sequence (5' to 3')           | Length (nt.) | T <sub>m</sub> (°C) |
|-------------------------|-------------------------|--------------------------------------|--------------|---------------------|
| EIF5A1                  | Sense                   | cggaattcgccaccatggcagatgacttggacttca | 37           | 68.9                |
|                         | Anti-sense              | cgggatcccgttttgccatggccttgattgca     | 32           | 67.0                |
| EIF5AL1                 | Sense                   | gaattcgccaccatggcagatgattggactt      | 32           | 63.1                |
|                         | Anti-sense              | ggatcccgttttgccatggccttgattgcaa      | 31           | 64.4                |
| EIF5A1 is the template  |                         |                                      |              |                     |
| EIF5A1-R36W             | Sense                   | cgatcttacatggccagcctttgagcaccac      | 31           | 78.98               |
|                         | Anti-sense c106t_       | gtggtgctcaaaggctggccatgtaagatcg      | 31           | 78.98               |
| EIF5A1-T45A             | Sense                   | cttgccagtcttgaagcagacatctcgacgatct   | 35           | 79.27               |
|                         | Anti-sense a133g_       | agatcgtcgagatgtctgcttgaagactggcaag   | 35           | 79.27               |
| EIF5A1-R109P            | Sense                   | cgaaggtcctctgtgtacctccccgc           | 25           | 78.38               |
|                         | Anti-sense g326c_       | gcggggagggtaccagaggaccttcg           | 25           | 78.38               |
| EIF5AL1 is the template |                         |                                      |              |                     |
| EIF5A1-R36W&T45A        | Sense                   | cgaaggtcctctcttacctccccgctgtcc       | 30           | 78.30               |
|                         | Anti-sense c325a_c326g_ | ggacagcggggaggtaagagaggaccttcg       | 30           | 78.30               |
| EIF5A1-R36W&R109P       | Sense                   | cttgccagtcttgaagtagacatctccacgatct   | 35           | 79.27               |
|                         | Anti-sense g133a_       | agatcgtggagatgtctacttgaagactggcaag   | 35           | 79.27               |
| EIF5A1-T45A&R109P       | Sense                   | cgatcttacatggcctgcctttgagcaccac      | 31           | 78.98               |
|                         | Anti-sense t106a_       | gtggtgctcaaaggcaggccatgtaagatcg      | 31           | 78.98               |

**Table S2.** Sequencing results of the EIF5A1 mutants (The first nucleotide is indicated by the blue arrow, the mutation site by the red arrow, and the last nucleotide by the green arrow).

| Gene Name    | Sequence                                                                             |
|--------------|--------------------------------------------------------------------------------------|
| EIF5A1-R36W  | 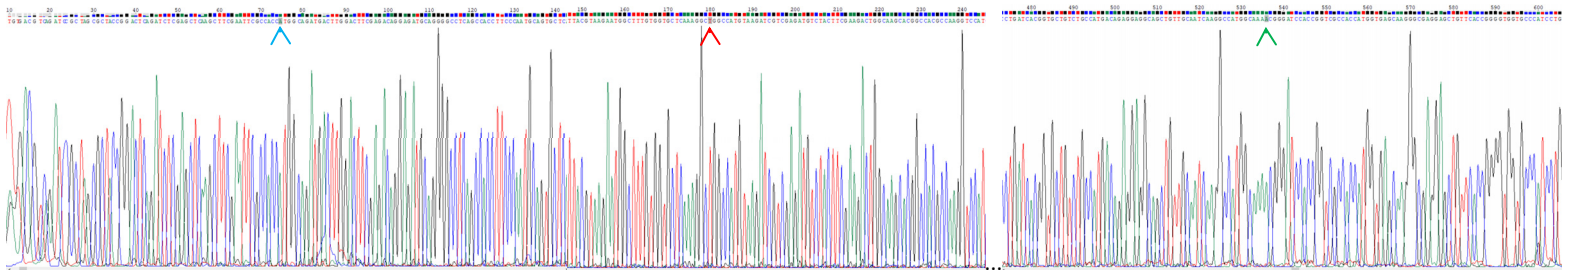   |
| EIF5A1-T45A  |    |
| EIF5A1-R109P |  |

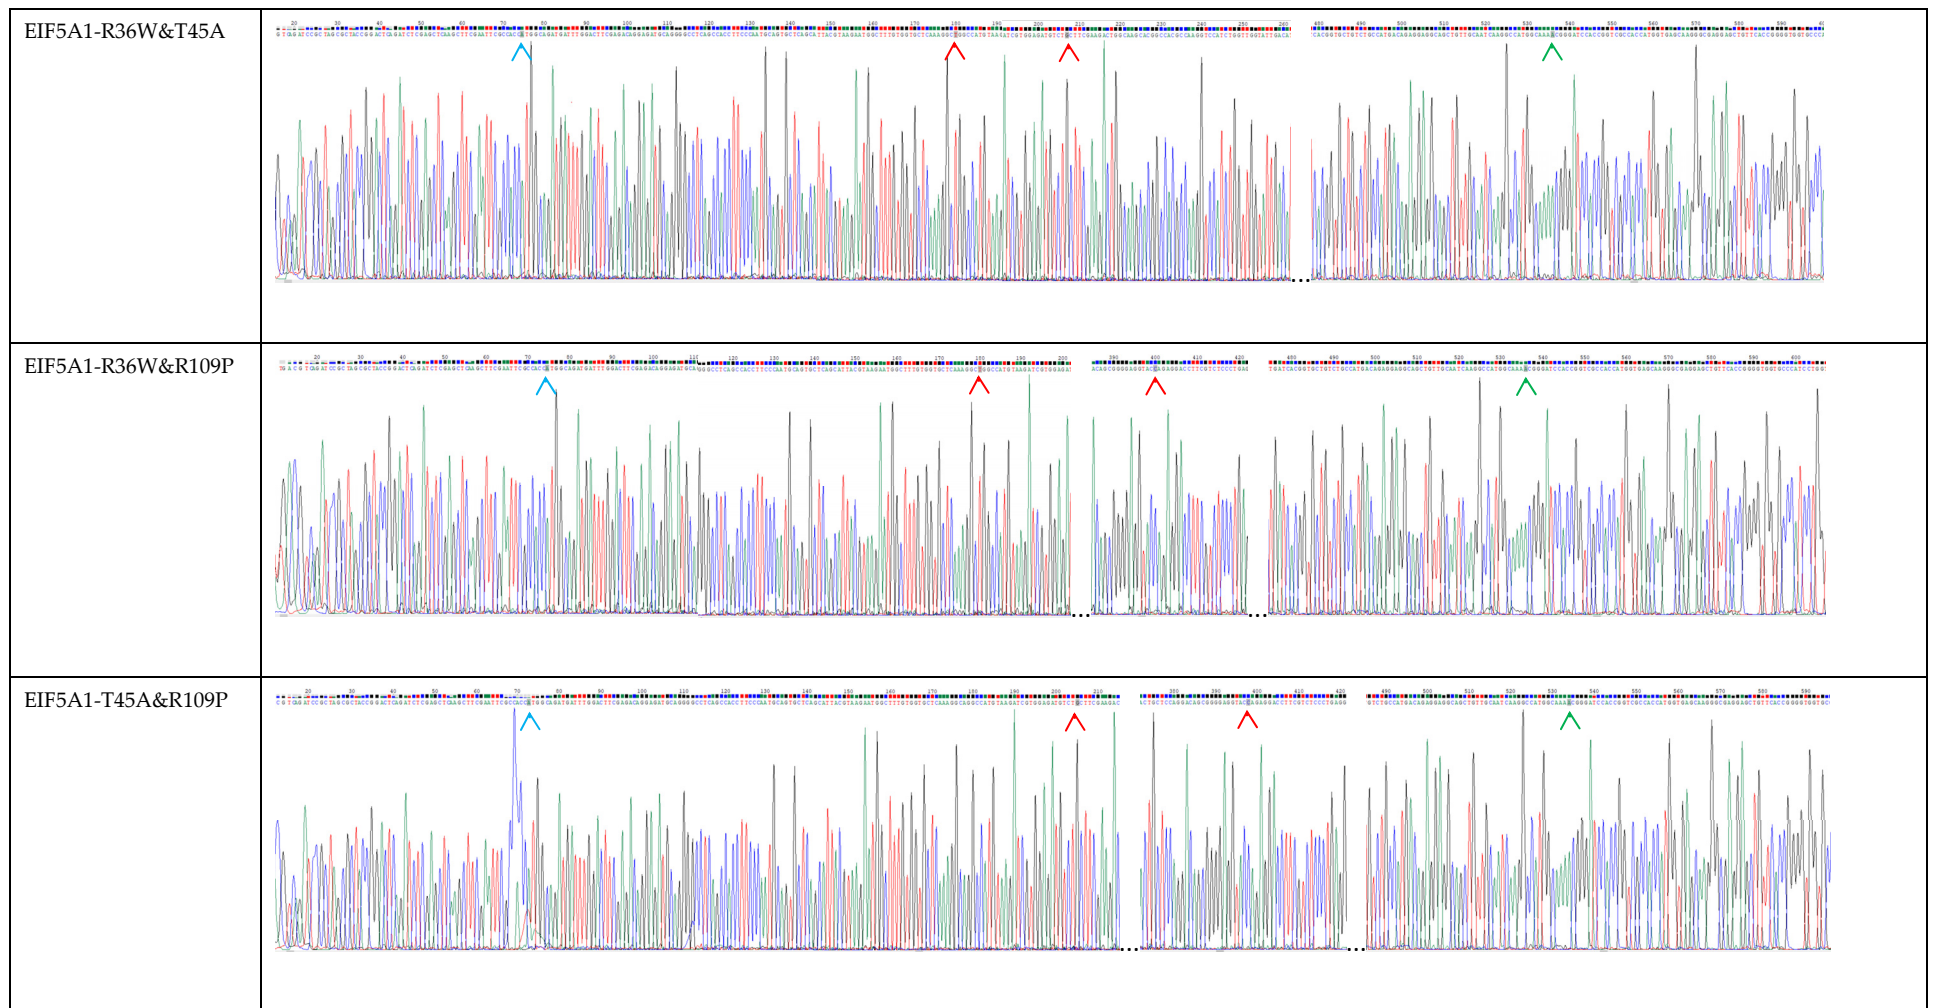

Supplement: s1 [file s1]
